# Supplementary material for: Glycerol Improves Skin Lesion Development in the Imiquimod Mouse Model of Psoriasis: Experimental Confirmation of Anecdotal Reports from Patients with Psoriasis
Source: MDPI journal article supplement (doi:10.3390/ijms22168749), 2021-08-15
Supplement: s1 [file s1]

## SUPPLEMENTARY MATERIAL

Glycerol improves skin lesion development in the imiquimod mouse model of psoriasis:

Experimental confirmation of anecdotal reports from patients with psoriasis

Vivek Choudhary, Ismail Kaddour-Djebbar, Victoria E. Custer, Rawipan Uaratanawong,  
Xunsheng Chen, Elyssa Cohen, Rong Yang, Etsubdenk Ajebo, Sarah Hossack and Wendy  
B. Bollag

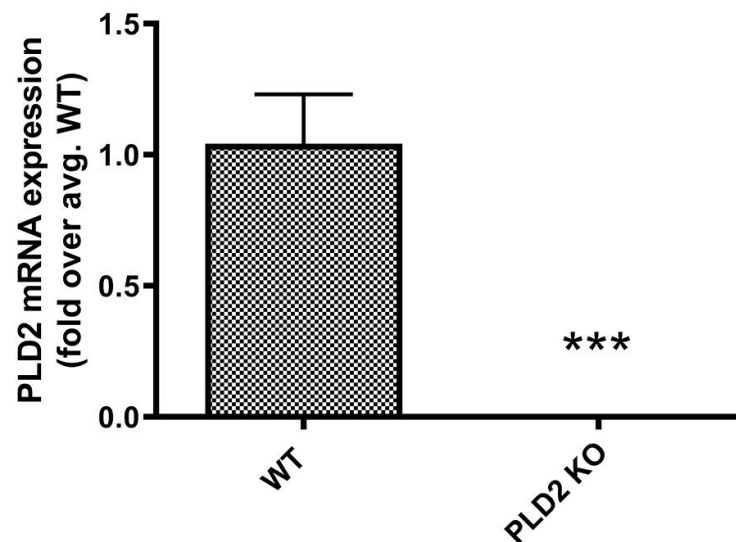

**Figure S1: PLD2 mRNA expression in back skin of the PLD2 knockout mice.** Mouse back skin from WT and PLD2 knockout mice was homogenized as described in Methods and RNA isolated. Quantitative RT-PCR analysis for PLD2 was performed using the delta-delta Ct method with Gapdh and Rplp0 as the endogenous control. Results represent the means  $\pm$  SEM expressed as percent maximal (n= 4-6). Two tailed t-test was used to determine statistically significant differences, \*\*\*p<0.001 versus WT.

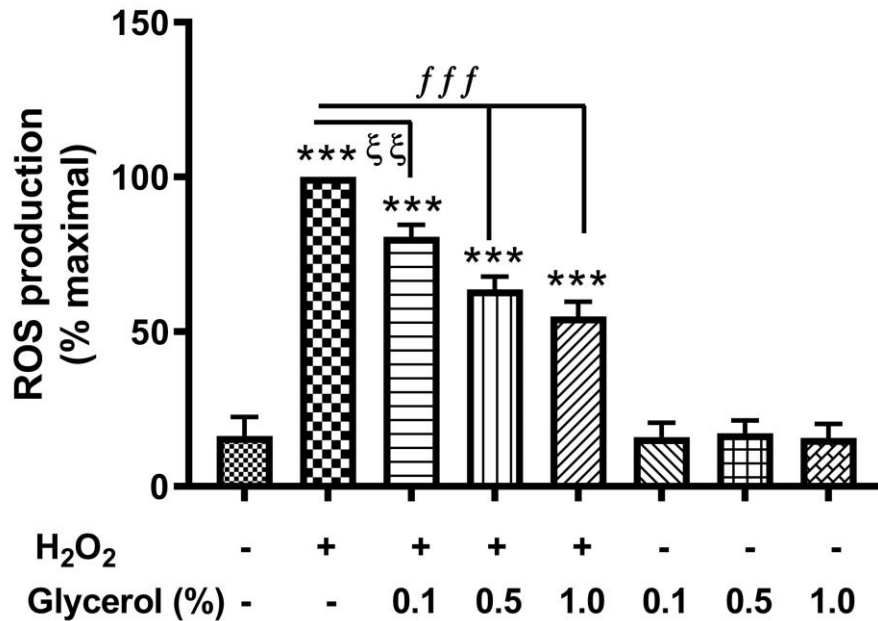

**Figure S2: Glycerol inhibits hydrogen peroxide transport, as measured by intracellular ROS levels, in primary cultures of mouse keratinocytes.** To measure hydrogen peroxide entry into cells, OxiSelect Intracellular ROS Assay kit (#STA-342, Cell Biolabs, Inc., San Diego, CA) was used as per the manufacturer's protocol. Briefly, primary cultures of mouse keratinocytes were plated on black cell culture fluorometric 96-well plates. The next day cells were washed twice with DPBS and 100  $\mu$ L of 1x DCFH-DA/media solutions were added and incubated for 30 minutes. Cells were washed twice with DPBS and then treated with 100  $\mu$ M hydrogen peroxide (H<sub>2</sub>O<sub>2</sub>) with or without glycerol (0.1 or 0.5 or 1.0%) as indicated for 1 hour. Fluorescence (intracellular ROS levels) was read by a fluorometric plate reader at 480 nm/530 nm from 5 min to 60 mins every 5 minutes and averaged from all time points. The ROS levels (fluorescence) are shown here as percent maximal and represent means  $\pm$  SEM (n=3). One-way analysis of variance with Student-Newman-Keuls multiple comparison post-hoc tests (GraphPad Prism, La Jolla, CA) was used to determine significant differences; \*\*\*p<0.001 versus control;  $\xi\xi$ p<0.01 or *fff*p<0.001 as indicated.

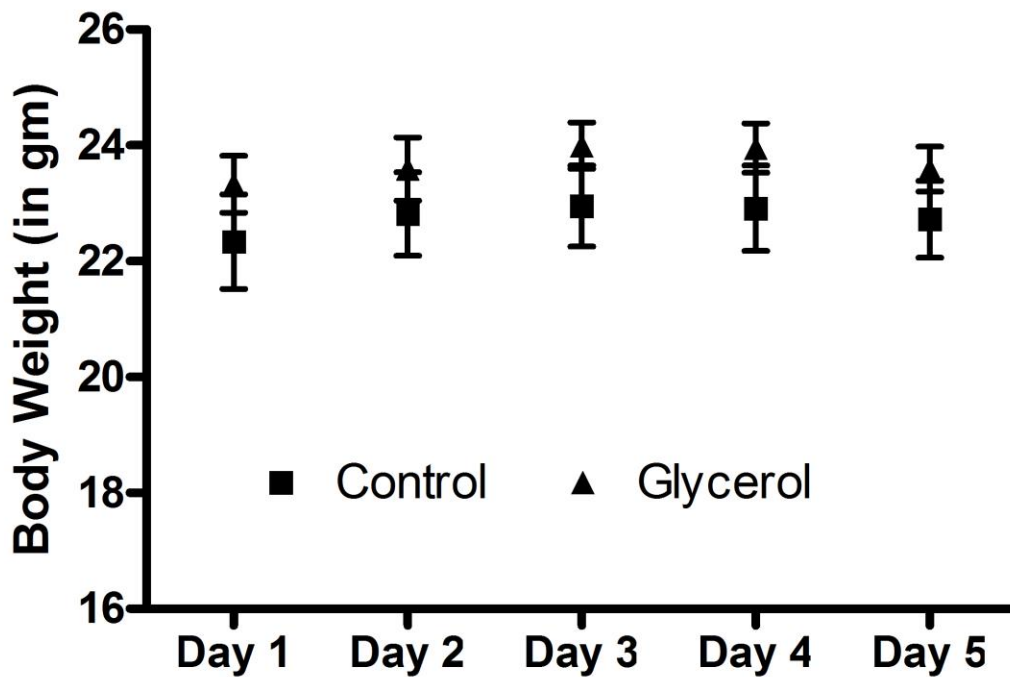

**Figure S3: Oral glycerol does not affect mouse body weight.** C57BL/6 mice receiving glycerol in the drinking water or not were treated with vehicle (petrolatum) or IMQ daily for 5 days. Body weights (in grams) of mice were recorded every day for 5 days. The quantitative data are presented as means  $\pm$  SEM (n=4-5). One-way analysis of variance with Student-Newman-Keuls multiple comparison post-hoc tests (GraphPad Prism, La Jolla, CA) was used to determine significant differences. The body weights of glycerol-fed mice were not different from control mice on any day.
